# Supplementary material for: Effectiveness of a Web-Based eHealth Portal for Delivery of Care to Home Dialysis Patients: A Single-Arm Pilot Study
Source: PubMed Central journal article supplement — Can J Kidney Health Dis. 2018 Sep 7;5:2054358118794415. doi: 10.1177/2054358118794415 (PMC6130084; doi:10.1177/2054358118794415), 2018-09-07
Supplement: SupplementaryFile2_Version2.pdf [file SupplementaryFile2_Version2.pdf]

Figure A: Timeline of assessment of study participants at baseline, six months, and 12 months

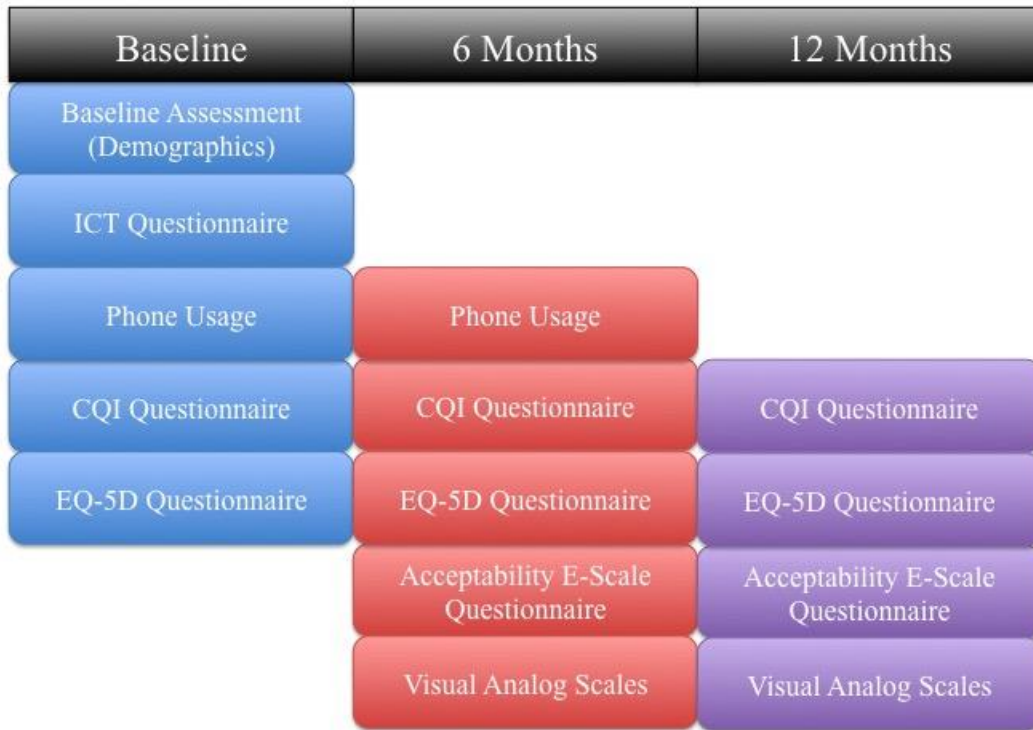

CQI: Consumer Quality Index  
 EQ-5D: EuroQol Five Dimensions  
 ICT: Information and Communication Technology

**Table A:** Comparison of demographics with patients who joined the online portal to those who consented to participate but did not join online.

| <b>Variable</b>                            | <b>Online Portal (N=27)</b> | <b>Did not join Portal (n=14)</b> | <b>p-value</b> |
|--------------------------------------------|-----------------------------|-----------------------------------|----------------|
| Age at dialysis initiation                 | 54.67 (50.52-58.81)         | 56.64 (48.83-64.45)               | 0.61           |
| Age at time of study consent               | 57.11 (53.15-61.08)         | 58.86 (51.06-66.65)               | 0.64           |
| Sex (Female)                               | 13 (48.15%)                 | 9 (64.29%)                        | 0.33           |
| Hypertension                               | 23 (85.19%)                 | 8 (61.54%)                        | 0.09           |
| Coronary Artery Disease                    | 6 (22.22%)                  | 6 (42.86%)                        | 0.17           |
| Cerebrovascular Disease                    | 1 (3.7%)                    | 1 (7.14%)                         | 0.63           |
| Peripheral Vascular Disease                | 4 (14.81%)                  | 2 (14.29%)                        | 0.96           |
| Diabetes                                   | 12 (44.44%)                 | 5 (35.71%)                        | 0.59           |
| Failed Kidney Transplant                   | 6 (14.29%)                  | 2 (22.22%)                        | 0.54           |
| Home Hemodialysis                          | 10 (37%)                    | 10 (71%)                          |                |
| Congestive Heart Failure                   | 3 (11.11%)                  | 2 (14.29%)                        | 0.77           |
| Smoker                                     | 4 (14.81%)                  | 2 (14.29%)                        | 0.96           |
| Median distance to home dialysis unit (km) | 81 (IQR: 13-131)            | 83.7 (10.9-149)                   | 0.79           |
| Median time to home dialysis unit (min)    | 70 (IQR: 22-110)            | 73 (22-107)                       | 0.74           |

**Table B:** Use of Information and Communication Technology in the past six months (n=21)

|                                                                      | <b>Used on Desktop/<br/>Laptop</b> | <b>Used on<br/>Handheld Device</b> | <b>Used on Both</b> | <b>Not Used</b> |
|----------------------------------------------------------------------|------------------------------------|------------------------------------|---------------------|-----------------|
| <b>Email/email lists (email mailing lists)</b>                       | 13 (61.9%)                         | 1 (4.8%)                           | 6 (28.6%)           | 1 (4.8%)        |
| <b>Secure internet messaging</b>                                     | 5 (23.8%)                          | 2 (9.5%)                           | 5 (23.8%)           | 9 (42.9%)       |
| <b>Message boards (web pages to list questions and view answers)</b> | 7 (33.3%)                          | 1 (4.8%)                           | 2 (9.5%)            | 11(52.4%)       |
| <b>Chat services (e.g. MSN messenger, Google Talk)</b>               | -                                  | 1 (4.8%)                           | 2 (9.5%)            | 18(85.7%)       |
| <b>Social Networking sites (e.g. Facebook)</b>                       | 9 (42.9%)                          | 2 (9.5%)                           | 6 (28.6%)           | 4(19.1%)        |
| <b>Blogs and microblogs (e.g. twitter)</b>                           | 2(9.5%)                            | 4 (19.0%)                          | 1 (4.8%)            | 14(66.7%)       |
| <b>Internet based voice calls (e.g. Skype, Google Talk)</b>          | 7 (33.3%)                          | 1 (4.8%)                           | 1 (4.8%)            | 12(57.1%)       |
| <b>Video sharing (e.g. YouTube)</b>                                  | 6 (28.6%)                          | 2 (9.5%)                           | 5 (23.8%)           | 8 (38.1%)       |
| <b>Web or video conferencing (e.g. Skype)</b>                        | 5 (23.8%)                          | 1 (4.8%)                           | 2 (9.5%)            | 13(61.9%)       |
| <b>Wikis (e.g. Wikipedia)</b>                                        | 6 (28.6%)                          | 2(9.5%)                            | 4(19.1%)            | 9 (42.9%)       |

**Table C: Additional Information and Communication Technology data on participants of the online portal (n=27)**

|                                                                                                                                                                                                        |                                                    |                                              |                                                                          |                                                             |                        |
|--------------------------------------------------------------------------------------------------------------------------------------------------------------------------------------------------------|----------------------------------------------------|----------------------------------------------|--------------------------------------------------------------------------|-------------------------------------------------------------|------------------------|
| <b>In the last 2 months have you used Telephone calls (e.g. calls on a landline, cell phone) to collaborate (includes learning) or interact with health care staff (mentors and mentees included)?</b> | <b>Yes</b>                                         |                                              | <b>No</b>                                                                |                                                             |                        |
|                                                                                                                                                                                                        | 17 (74.0%)                                         |                                              | 6 (26.0%)                                                                |                                                             |                        |
| <b>Among those who answered 'Yes' to above</b>                                                                                                                                                         | <b>Fixed line conventional phone</b>               | <b>Cellular/mobile phone service</b>         | <b>Both</b>                                                              |                                                             |                        |
| <b>In the last 2 months how do you make telephone calls to any members of health care staff</b>                                                                                                        | 10 (55.6%)                                         | 3 (16.7%)                                    | 5 (27.8%)                                                                |                                                             |                        |
|                                                                                                                                                                                                        | <b>Several Times a day</b>                         | <b>About once a day</b>                      | <b>3-5 days/week</b>                                                     | <b>1-2 days/week</b>                                        | <b>Every Few Weeks</b> |
| <b>In the last 2 months how often have you used telephone calls to collaborate and interact with the members of health care staff</b>                                                                  | 0                                                  | 0                                            | 0                                                                        | 2 (11.1%)                                                   | 16 (88.9%)             |
|                                                                                                                                                                                                        | <b>Communicate to set up face to face meetings</b> | <b>To discuss health care related issues</b> | <b>Communicate with health care administration (e.g. about meetings)</b> | <b>To build relationships with healthcare staff members</b> | <b>Other uses</b>      |
| <b>For which of the following purposes do you use telephone calls when collaborating and interacting with the members of health care staff (select all that apply)</b>                                 | 5                                                  | 17                                           | 1                                                                        | 0                                                           | 0                      |
|                                                                                                                                                                                                        | <b>Once a day or more often</b>                    | <b>Once a week up to one day</b>             | <b>1-3 times/month</b>                                                   | <b>Less often</b>                                           | <b>None</b>            |
| <b>In the last 2 months how often have you interacted with health care staff?</b>                                                                                                                      | 0                                                  | 4 (16.7%)                                    | 10 (41.6%)                                                               | 9 (37.5%)                                                   | 1 (4.2%)               |
| <b>Indicate which of the following</b>                                                                                                                                                                 | <b>Already Using</b>                               | <b>Interested</b>                            | <b>Not Interested</b>                                                    | <b>Don't know enough</b>                                    |                        |

**technologies that you are not already using which might be interesting to you to communicate with health care staff**

**about this tool**

|                                                |           |            |            |           |
|------------------------------------------------|-----------|------------|------------|-----------|
| <b>Messaging (e.g. SMS)</b>                    | 5 (18.5%) | 4 (14.8%)  | 6 (22.2%)  | 5 (27.8%) |
| <b>Email/ email lists (e.g. LISTSERV)</b>      | 8 (29.6%) | 9 (33.3%)  | 1 (3.7%)   | 3 (11.1%) |
| <b>Secure internet messaging</b>               | 7 (25.9%) | 10 (37.0%) | 2 (7.4%)   | 2 (7.4%)  |
| <b>Message boards</b>                          | 3 (11.1%) | 3 (11.1%)  | 7 (25.9%)  | 6 (22.2%) |
| <b>Chat services (e.g. MSN messenger)</b>      | 3 (11.1%) | 3 (11.1%)  | 12 (44.4%) | 3 (11.1%) |
| <b>Social Networking sites (e.g. Facebook)</b> | 8 (29.6%) | 5 (18.5%)  | 7 (25.9%)  | 2 (7.4%)  |
| <b>Blogs and microblogs (e.g. Twitter)</b>     | 3 (11.1%) | 4 (14.8%)  | 5 (18.5%)  | 9 (33.3%) |
| <b>Voice calls (e.g. Skype)</b>                | 5 (18.5%) | 8 (29.63%) | 4 (14.8%)  | 4 (14.8%) |
| <b>Video sharing (e.g. YouTube)</b>            | 6 (22.2%) | 4 (14.8%)  | 6 (22.2%)  | 6 (22.2%) |
| <b>Web/video conferencing</b>                  | 2 (7.4%)  | 5 (18.5%)  | 5 (18.5%)  | 8 (29.6%) |
| <b>Wikis (e.g. Wikipedia)</b>                  | 4 (14.8%) | 3 (11.1%)  | 7 (25.9%)  | 6 (22.2%) |

**Table D: Consumer Quality Index in three domains (Nephrology, Nursing, Dieticians) of the patients who consented to participating in the study (where 1 = Never, 2 = Sometimes, 3 = Usually, and 4 = Always), n=31**

|                                                                           | <b>Score at Baseline</b> | <b>p-value<sup>a</sup></b> |
|---------------------------------------------------------------------------|--------------------------|----------------------------|
| <b>Nephrologist's care and communication</b>                              | <b>3.62 (3.48,3.77)</b>  | 0.91                       |
| <i>Nephrologist explained things clearly</i>                              | 3.58 (3.40,3.76)         |                            |
| <i>Nephrologist provided information to enable shared decision making</i> | 3.35 (3.08,3.63)         |                            |
| <i>Nephrologist listened attentively</i>                                  | 3.52 (3.31,3.73)         |                            |
| <i>Nephrologist took concerns seriously</i>                               | 3.55 (3.34,3.76)         |                            |
| <i>Nephrologist was respectful</i>                                        | 3.84 (3.67,4.00)         |                            |
| <i>Nephrologist spent enough time with patient</i>                        | 3.40 (3.17,3.63)         |                            |
| <i>Nephrologist involves patient in decision making</i>                   | 3.32 (3.07,3.58)         |                            |
| <i>Nephrologist asks about medication use</i>                             | 3.67 (3.44,3.89)         |                            |
| <i>Nephrologist spends enough time on physical complaints</i>             | 3.38 (3.13,3.64)         |                            |
| <b>Nurse's care and communication</b>                                     | <b>3.65 (3.47,3.82)</b>  | 0.6                        |
| <i>Nurses explained things clearly</i>                                    | 3.68 (3.48,3.88)         |                            |
| <i>Being taken seriously by nurses</i>                                    | 3.61 (3.41,3.82)         |                            |
| <b>Dietician's care and communication</b>                                 | <b>3.60 (3.40,3.78)</b>  | 0.99                       |
| <i>Dietician explaining things clearly</i>                                | 3.71 (3.52,3.90)         |                            |
| <i>Providing information on recommended diet</i>                          | 3.35 (3.08,3.63)         |                            |
| <i>Taken seriously by dietician</i>                                       | 3.71 (3.52,3.90)         |                            |

<sup>a</sup>Comparison of non-online group to online group
